# Supplementary material for: F-coordinated single-atom Ru species: efficient and durable catalysts for photo-thermal synergistic catalytic CO2 hydrogenation to methane
Source: Royal Society of Chemistry journal article supplement (doi:10.1039/d4ta02984d), 2024-01-01
Supplement: d4ta02984d1.pdf [file d4ta02984d1.pdf]

## Supporting Information

### **F-coordinated Single-atom Ru Species: Efficient and Durable Catalysts for Photo-Thermal Synergistic Catalytic CO<sub>2</sub> Hydrogenation to Methane**

Yunxiang Tang<sup>a</sup>, Hao Wang<sup>a</sup>, Chan Guo<sup>a</sup>, Lige Wang<sup>b</sup>, Tingting Zhao<sup>a</sup>, Zhengyi Yang<sup>a</sup>,  
Shikang Xiao<sup>a</sup>, Jiurong Liu<sup>a</sup>, Yanyan Jiang<sup>a</sup>, Yufei Zhao<sup>c</sup>, Xiao-Dong Wen<sup>d,e</sup>, Fenglong  
Wang<sup>a,\*</sup>

<sup>a</sup> Key Laboratory for Liquid-Solid Structural Evolution and Processing of Materials Ministry  
of Education, Shandong University, Jinan, 250061, P. R. China

<sup>b</sup> Shenzhen Research Institute of Shandong University, Shenzhen, Guangdong, 518057, P. R.  
China

<sup>c</sup> State Key Laboratory of Chemical Resource Engineering, Beijing University of Chemical  
Technology, Beijing, 100029, China

<sup>d</sup> State Key Laboratory of Coal Conversion, Institute of Coal Chemistry, Chinese Academy of  
Sciences, Taiyuan, Shanxi, 030001, P. R. China

<sup>e</sup> National Energy Center for Coal to Liquids, Synfuels China Co., Ltd, Huairou District,  
Beijing, 101400, P. R. China

**\*Corresponding Author's Emails:**

fenglong.wang@sdu.edu.cn (F.L.W)

## **Experimental**

### **Materials**

Ruthenium acetate hydrate ( $\text{Ru}(\text{OAc})_n \cdot x\text{H}_2\text{O}$ ), praseodymium nitrate hexahydrate ( $\text{Pr}(\text{NO}_3)_3 \cdot 6\text{H}_2\text{O}$ ), aluminium nitrate nonahydrate ( $\text{Al}(\text{NO}_3)_3 \cdot 9\text{H}_2\text{O}$ ), ammonium fluoride ( $\text{NH}_4\text{F}$ ) and urea were obtained from Shanghai Macklin Biochemical Co., Ltd. All the chemicals were of analytical grade and used as received.

### **Synthesis of Ru-doping PrAl LDH**

Typically, 0.1 mmol of  $\text{Ru}(\text{OAc})_3$ , 1 mmol of  $\text{Pr}(\text{NO}_3)_3 \cdot 6\text{H}_2\text{O}$ , 5 mmol of  $\text{Al}(\text{NO}_3)_3 \cdot 9\text{H}_2\text{O}$ , 2.5 mmol of  $\text{NH}_4\text{F}$  and 10 mmol of urea were dissolved into 30 mL methanol with vigorous stirring for 1 h. The mixture was then transferred into a 100 mL stainless steel autoclave and heated at 150 °C for 12 h. Finally, the product was collected by centrifugation and dried at 70 °C for 10 h. By changing the molar amount of  $\text{Ru}(\text{OAc})_3$ , Ru-doping PrAl LDH with different Ru contents were prepared.

### **Synthesis of Ru-F<sub>4</sub> SAs/PA**

The Ru- $\text{PrF}_3/\text{Al}_2\text{O}_3$  (Ru-F<sub>4</sub> SAs/PA) was obtained by calcining the Ru-doping PrAl LDH in 5 vol.%  $\text{H}_2/\text{N}_2$  stream at 300 °C for 2 h with a ramping rate of 3 °C/min.

### **Synthesis of Ru-O<sub>4</sub> SAs/PA**

The synthesis procedures for Ru- $\text{Pr}_2\text{O}_3/\text{Al}_2\text{O}_3$  (Ru-O<sub>4</sub> SAs/PA) were similar to those of Ru-F<sub>4</sub> SAs/PA, except for the absence of that  $\text{NH}_4\text{F}$  during the preparation of Ru-

doping PrAl LDH.

### **Synthesis of PrF<sub>3</sub>/Al<sub>2</sub>O<sub>3</sub> and Pr<sub>2</sub>O<sub>3</sub>/Al<sub>2</sub>O<sub>3</sub>**

The PrF<sub>3</sub>/Al<sub>2</sub>O<sub>3</sub> and Pr<sub>2</sub>O<sub>3</sub>/Al<sub>2</sub>O<sub>3</sub> support were also prepared through a similar procedure without introducing the Ru precursor.

### **Characterizations**

A Bruker D8 X-ray diffractometer was employed to record the X-ray diffraction (XRD) patterns with a scanning speed of 4°/min. The Ru contents were evaluated by an inductively coupled plasma atomic emission spectrometer on an Agilent 7800 instrument. The Brunauer-Emmet-Teller (BET) and Barrett-Joyner-Halenda (BJH) method were employed to measure the specific surface area and pore size distribution on an ASAP2460 instrument. Surface chemical states were analyzed using X-ray photoelectron spectroscopy (XPS, SCIENTIFIC ESCALAB 250Xi). The optical properties of catalysts were evaluated by a Shimadzu UV-3600 spectrophotometer. The aberration-corrected high-angle annular dark-field scanning TEM (HAADF-STEM) images and energy-dispersive X-ray (EDX) elemental mappings were obtained on a TFS Spectra 300 instrument. The X-ray absorption spectra (XAS) at the Ru K-edge of the samples were recorded in the BL 14W1 of Shanghai Synchrotron Radiation Facility (SSRF). A double Si (111) crystal monochromator was used for energy selection. The Athena software package was used to analyze the data. H<sub>2</sub> temperature-programmed reduction (H<sub>2</sub>-TPR) measurements were carried out on BELCAT II BelMass instrument. Typically, the sample was initially heated to 300 °C with a ramping rate of

10 °C min<sup>-1</sup> in an Ar flow (30 mL min<sup>-1</sup>) and then cooled to 50 °C. After that, the sample was heated to 800 °C with a ramping rate of 10 °C min<sup>-1</sup> in a 10% H<sub>2</sub>/Ar mixed flow (30 mL min<sup>-1</sup>) atmosphere and the outlet gas was detected by thermal conductivity detector (TCD). CO<sub>2</sub> temperature-programmed desorption (CO<sub>2</sub>-TPD) measurements were conducted on BELCAT II BelMass instrument. Typically, the sample was initially heated to 300 °C with a ramping rate of 10 °C min<sup>-1</sup> in an He flow (50 mL min<sup>-1</sup>) and then cooled to 50 °C. Following this, a 10% CO<sub>2</sub>/He mixed flow (50 mL min<sup>-1</sup>) was introduced to the catalyst bed for 1 h. The sample was then exposed to He (50 mL min<sup>-1</sup>) for 1 h to remove the physically adsorbed CO<sub>2</sub> from the surface. Finally, the sample was heated to 800 °C with a ramping rate of 10 °C min<sup>-1</sup> in a He atmosphere and the outlet gas was detected by TCD.

### **Photothermal properties measurements**

In the photo-to-thermal conversion performance evaluation, the surface temperature change of catalysts with the same distance from light source was measured by the infrared temperature camera (FLIR E8XT). Typically, the samples (50 mg of the catalyst was diluted into 1.2 g of quartz sand) were packed in the same quartz reactor as the one used for catalytic performance evaluation, and then the reactor was irradiated by a 300 W Xe lamp (200-1100 nm, 1.9 W cm<sup>-2</sup>).

***In situ* diffuse reflectance infrared Fourier transform spectroscopy (*In situ* DRIFTS) analysis**

*In situ* DRIFTS spectra were collected using a Bruker Vertex 70 spectrometer with a mercury-cadmium-telluride (MCT) detector. The DRIFTS reaction cell (Harrick) was equipped with CaF<sub>2</sub> windows and a heating cartridge. Before the test, the samples were pretreated in 5% vol.% H<sub>2</sub>/Ar atmosphere at 300 °C for 30 min. Then, the reaction cell was cooled to at room temperature in N<sub>2</sub> to recorded the background spectrum. Subsequently, a mixture of 15 vol.% CO<sub>2</sub>, 45 vol.% H<sub>2</sub> and 40 vol.% Ar was introduced into the reaction cell, and the spectra were collected in different temperatures. To simulate the reaction condition of photo-thermal synergistic catalytic CO<sub>2</sub> hydrogenation, an optical fiber equipped with a 300 W Xe lamp was introduced into the reaction cell passing through the quartz window. The spectra were recorded under light irradiation at 250 °C.

### **Catalytic performance evaluation**

CO<sub>2</sub> hydrogenation experiments were carried out in a continuous flow fixed-bed quartz tubular reactor at atmospheric pressure (Beijing China Education Au-light Co., China, Figure S1). The square-sharped quartz reactor (24 mm × 24 mm) was 2 mm thick, located in the middle of the quartz tube and was placed on a groove carved out to accommodate the tube. In a typical experiment, 50 mg of catalysts powder were diluted with 1.2 g of quartz sands (ca. 0.42 mm in diameter) and then the mixture was packed in the reactor. The set temperature of the reactor was realized by an electronic temperature-controlled furnace. Meanwhile, the actual temperature of catalyst surface under light irradiation was monitored by a thermocouple inserted into the quartz tube

just underneath the catalyst bed. The feed gas consisted of 80 vol % H<sub>2</sub> and 20 vol % CO<sub>2</sub>, with a flow rate of 20 mL/min, which corresponds to a GHSV of 24000 mL h<sup>-1</sup> g<sub>cat</sub><sup>-1</sup>. For the photo-thermal synergistic catalytic CO<sub>2</sub> hydrogenation reaction, a 300 W Xe lamp ( $\lambda = 200\text{-}1100$  nm, 1.9 W cm<sup>-2</sup>) was used as the light source, which irradiated the catalyst surface through a quartz window and the area for irradiation was 5.76 cm<sup>2</sup>. To prevent any gaseous product condensation, the outlet gas line was kept at 120 °C. The concentrations of CO<sub>2</sub> and products in the effluent gas were periodically analyzed using an online gas chromatograph equipped with a flame ionization detector (FID) and a TCD using N<sub>2</sub> as carrier gas.

The CO<sub>2</sub> conversion ( $X_{\text{CO}_2}$ , %), products selectivity (S, %) and CH<sub>4</sub> production rate ( $r(\text{CH}_4)$ ) are calculated according to the following equations:

$$X_{\text{CO}_2} (\%) = \frac{n^{\text{CO}_2, \text{in}} - n^{\text{CO}_2, \text{out}}}{n^{\text{CO}_2, \text{in}}} \times 100$$

$$S_{\text{CH}_4} (\%) = \frac{n^{\text{CH}_4}}{n^{\text{CH}_4} + n^{\text{CO}} + n^{\text{CH}_3\text{OH}}} \times 100$$

$$S_{\text{CH}_3\text{OH}} (\%) = \frac{n^{\text{CH}_3\text{OH}}}{n^{\text{CH}_4} + n^{\text{CO}} + n^{\text{CH}_3\text{OH}}} \times 100$$

$$r(\text{CH}_4) = \frac{v_{\text{CO}_2} \times t \times X_{\text{CO}_2} \times S_{\text{CH}_4}}{V_m \times m}$$

Where  $n_{\text{CO}_2, \text{in}}$  and  $n_{\text{CO}_2, \text{out}}$  are the mole numbers of CO<sub>2</sub> in the inlet and outlet;  $n_{\text{CH}_4}$ ,  $n_{\text{CO}}$  and  $n_{\text{CH}_3\text{OH}}$  represent the mole numbers of CH<sub>4</sub> and CH<sub>3</sub>OH in the products.

### Density functional theory (DFT) calculations

We utilized the Vienna Ab Initio Package (VASP) to conduct density functional theory (DFT) calculations within the generalized gradient approximation (GGA) in the PBE formulation<sup>1</sup>. Projected augmented wave (PAW) potentials were selected to describe the ionic cores and incorporate valence electrons, employing a plane wave basis set with a kinetic energy cutoff of 450 eV.<sup>2-3</sup> Partial occupancies of the Kohn-Sham orbitals were allowed using the Methfessel-Paxton smearing method with a width of 0.05 eV. The electronic energy was considered self-consistent when the energy change was smaller than  $10^{-5}$  eV. Geometry optimization was considered convergent when the residual forces were smaller than 0.05 eV/Å. The Gibbs free energy was calculated using the following Equation:

$$\Delta G_{\text{ads}} = E_{\text{ads}} + \Delta E_{\text{ZPE}} - \Delta TS$$

where  $E_{\text{ads}}$  was the ground energy,  $\Delta E_{\text{ZPE}}$  was the zero-point energy change and  $\Delta S$  was the entropy change. In this work, the values of  $\Delta E_{\text{ZPE}}$  and  $\Delta S$  were obtained by vibration frequency calculation.

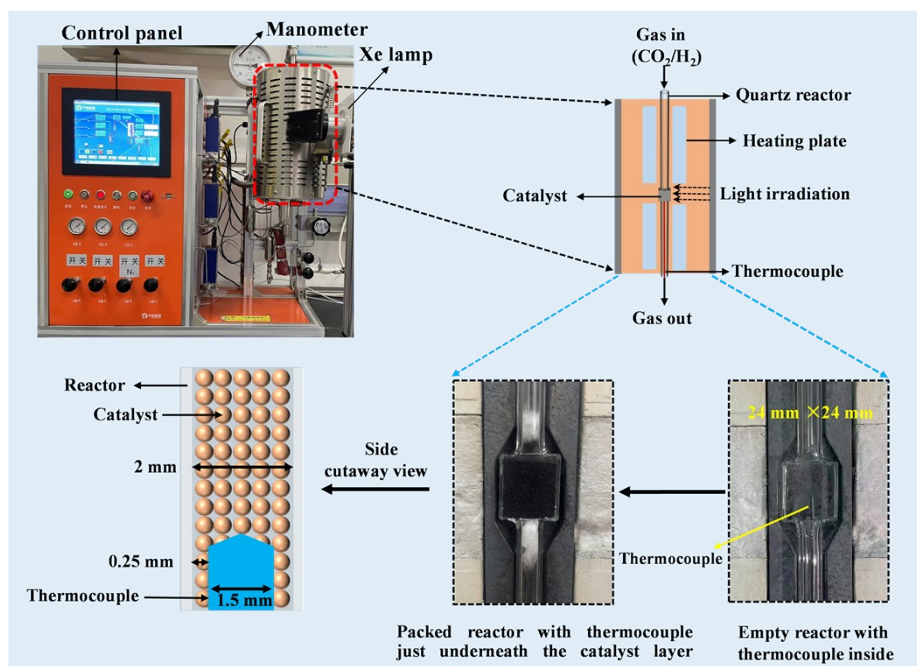

**Figure S1.** Digital photo of equipment for CO<sub>2</sub> hydrogenation and the schematic illustration of the reactor.

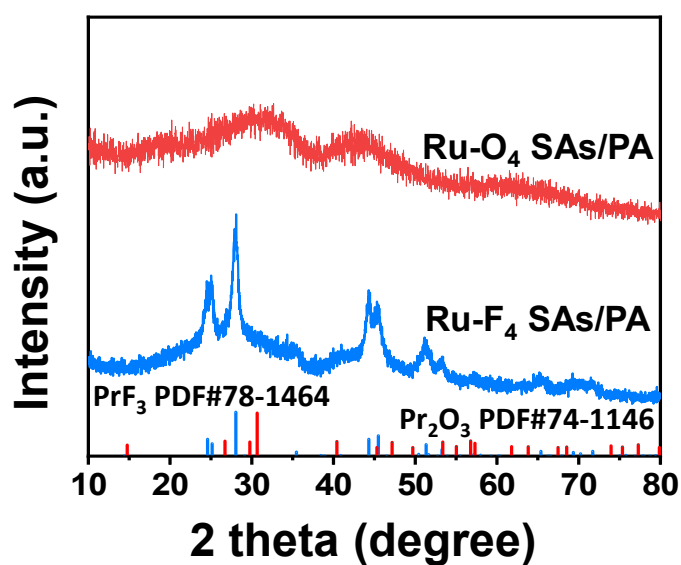

**Figure S2.** XRD patterns of Ru-F<sub>4</sub> SAs/PA and Ru-O<sub>4</sub> SAs/PA.



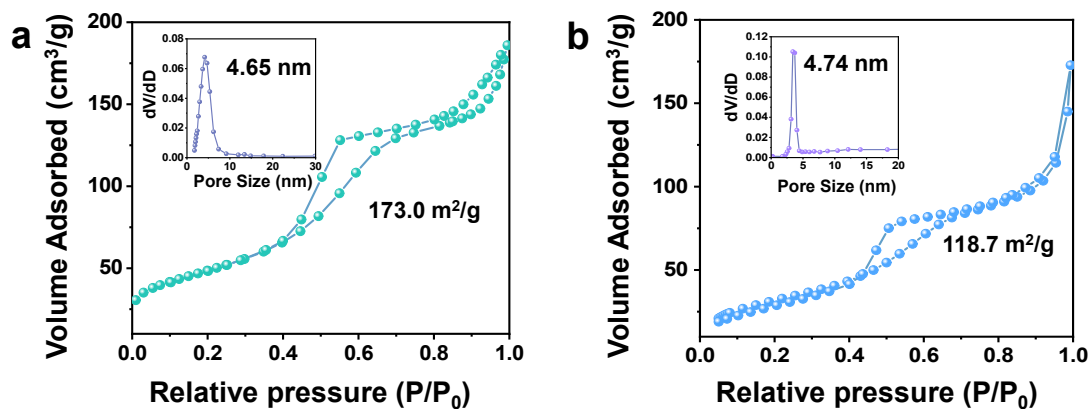

**Figure. S3.**  $N_2$  adsorption-desorption isotherm of Ru-F<sub>4</sub> SAs/PA and Ru-O<sub>4</sub> SAs/PA.

The inset is the corresponding pore size distribution curve.

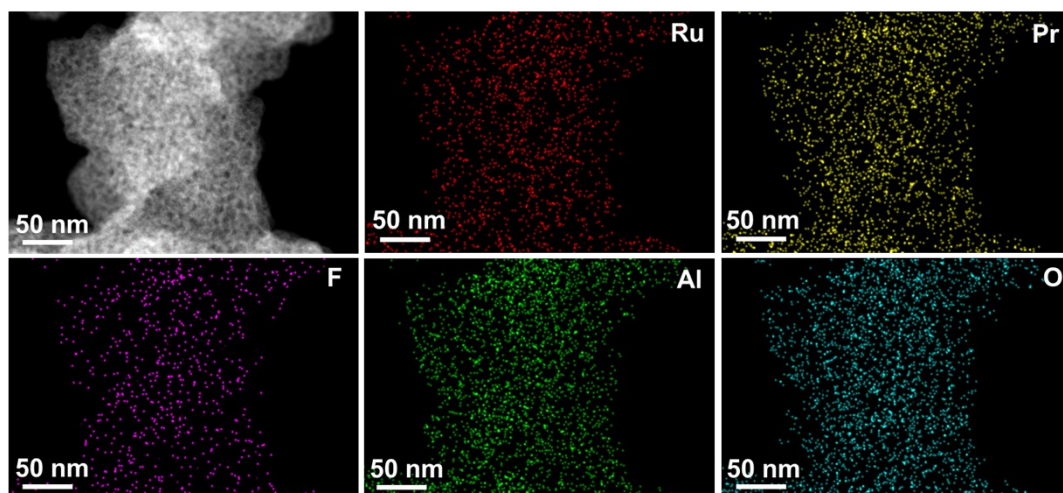

**Figure S4.** AC-HAADF-STEM images and corresponding EDS mappings of Ru-F<sub>4</sub> SAs/PA.

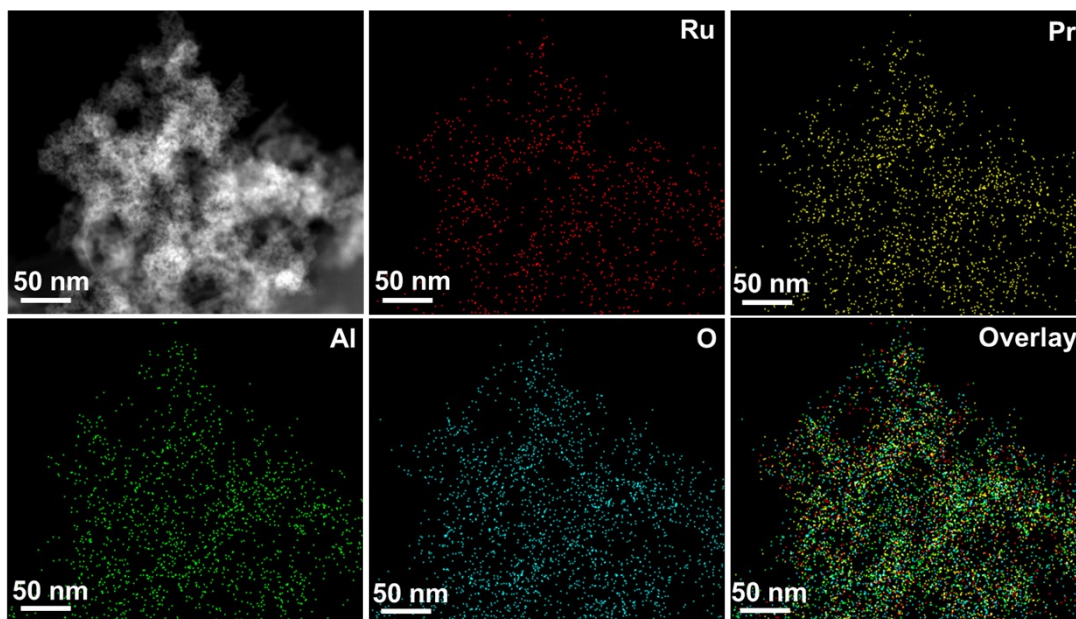

**Figure S5.** AC-HAADF-STEM images and corresponding EDS mappings of Ru-O<sub>4</sub> SAs/PA.

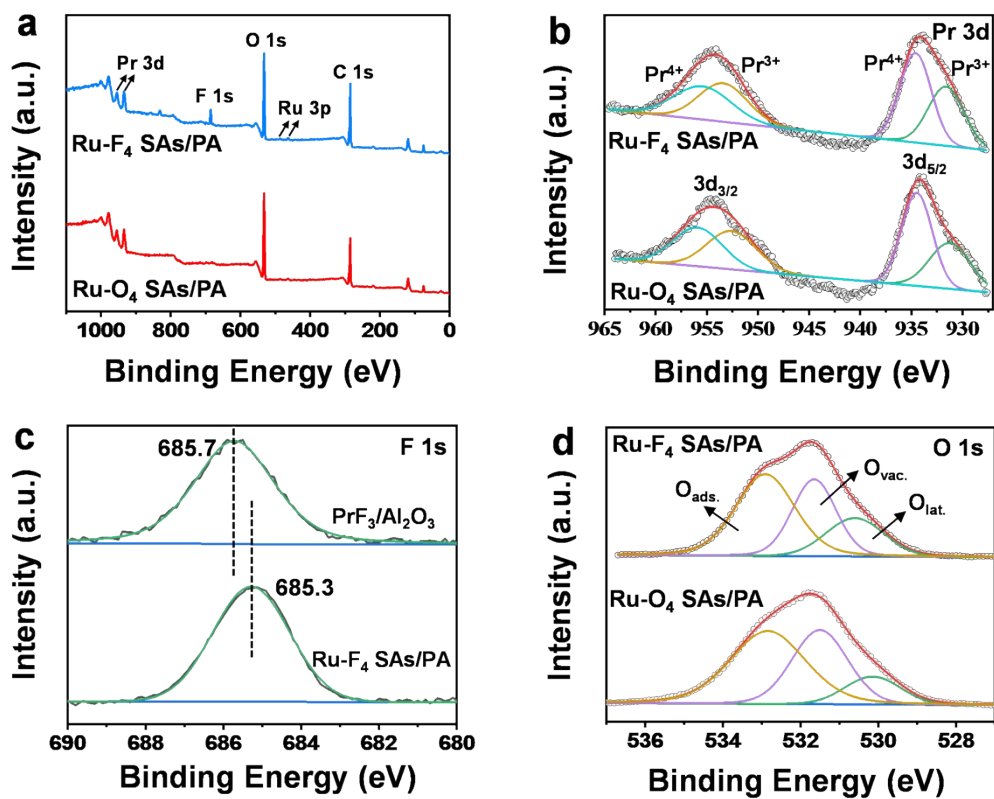

**Figure. S6.** (a) Survey-scan XPS spectra of Ru-F<sub>4</sub> SAs/PA and Ru-O<sub>4</sub> SAs/PA. High-resolution (b) Pr 3d, (c) F 1s and (d) O 1s XPS spectra of PrF<sub>3</sub>/Al<sub>2</sub>O<sub>3</sub>, Ru-F<sub>4</sub> SAs/PA and Ru-O<sub>4</sub> SAs/PA.

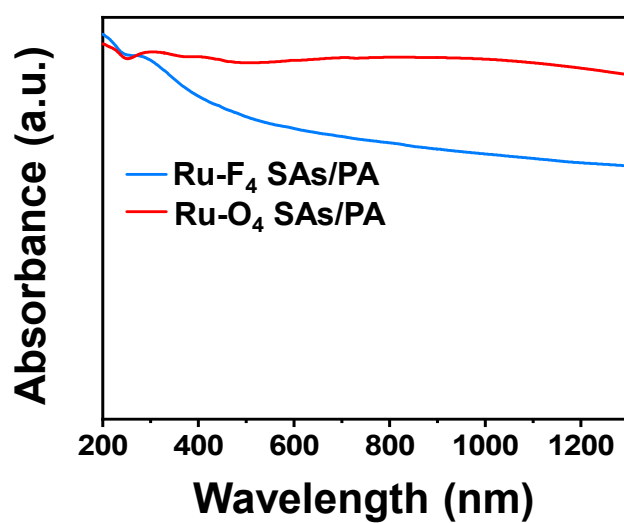

**Figure. S7.** UV-Vis DRS of Ru-F<sub>4</sub> SAs/PA and Ru-O<sub>4</sub> SAs/PA catalysts.

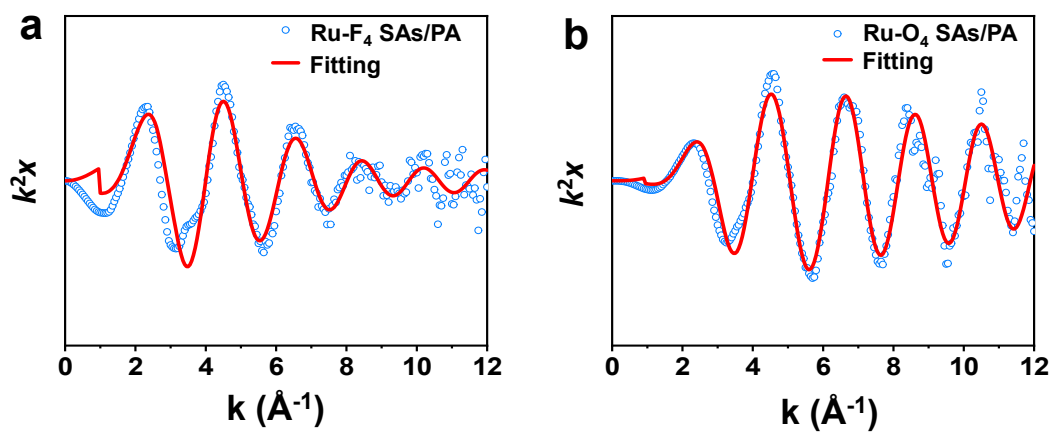

**Figure. S8.** k space spectra fitting curves for (a) Ru-F<sub>4</sub> SAs/PA and (b) Ru-O<sub>4</sub> SAs/PA.

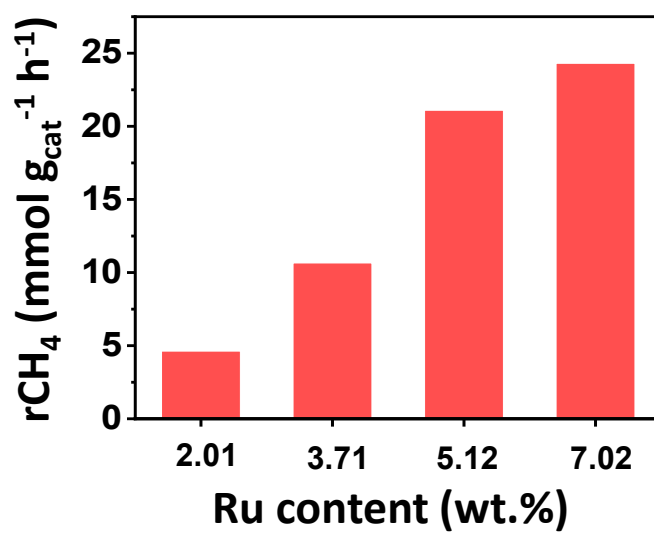

**Figure. S9.** CH<sub>4</sub> production rate of Ru-F<sub>4</sub> SAs/PA catalysts with different Ru content.

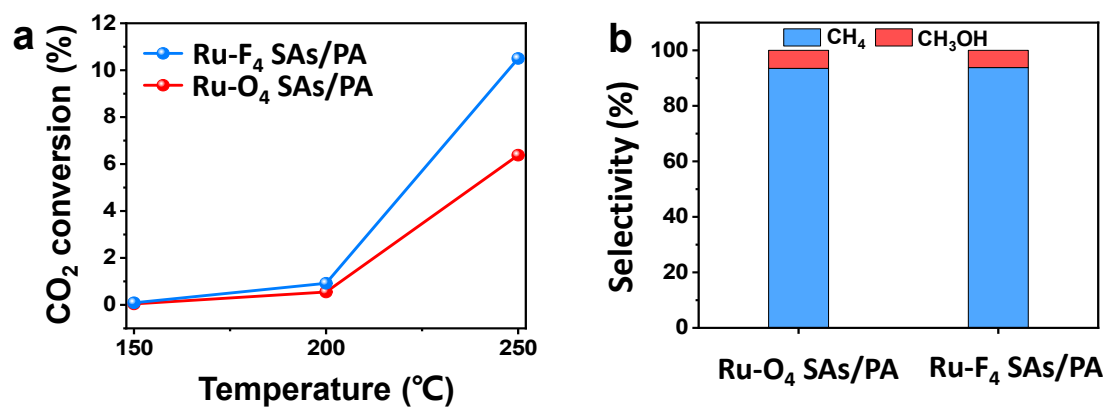

**Figure. S10.** (a) CO<sub>2</sub> conversion efficiency and (b) product selectivity of Ru-F<sub>4</sub> SAs/PA and Ru-O<sub>4</sub> SAs/PA catalysts.

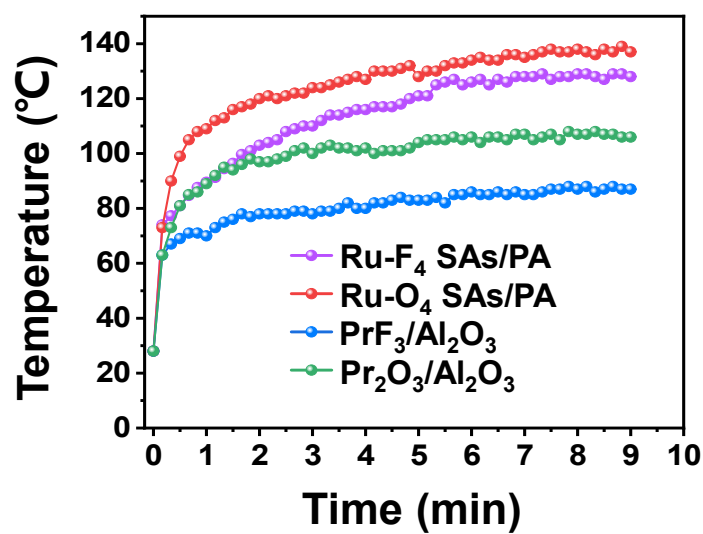

**Figure. S11.** Surface temperature changes of prepared catalysts under light irradiation (200-1100 nm, 1.9 W cm<sup>-2</sup>).

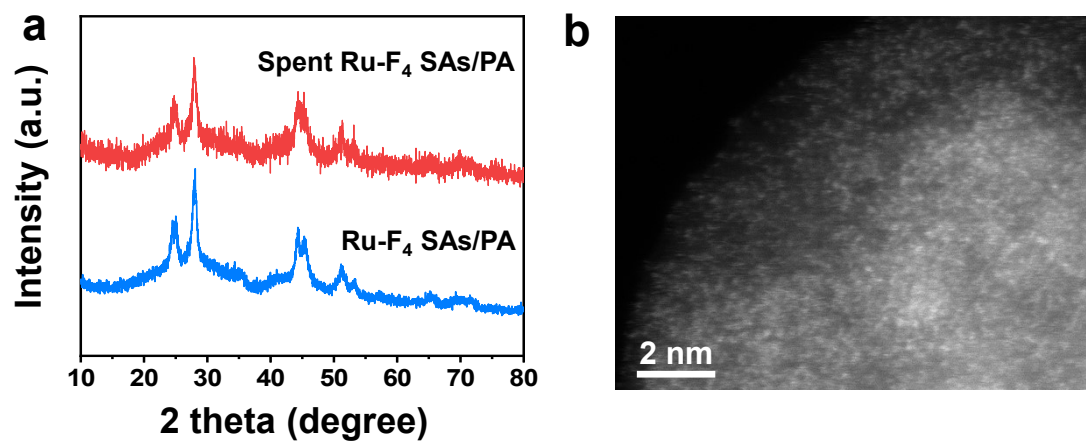

**Figure. S12.** (a) XRD patterns of Ru-F<sub>4</sub> SAs/PA before and after CO<sub>2</sub> hydrogenation reaction. (b) HAADF-STEM image of spent Ru-F<sub>4</sub> SAs/PA.

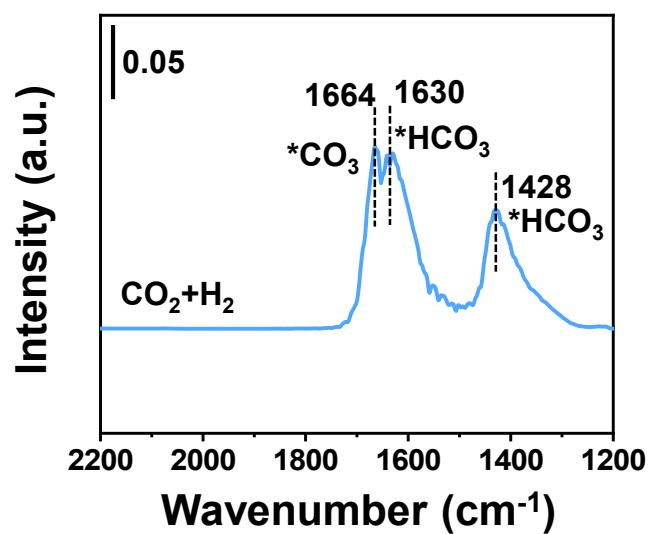

**Figure. S13.** *In situ* DRIFTS spectra of Ru-F<sub>4</sub> SAs/PA at 30 °C in dark.

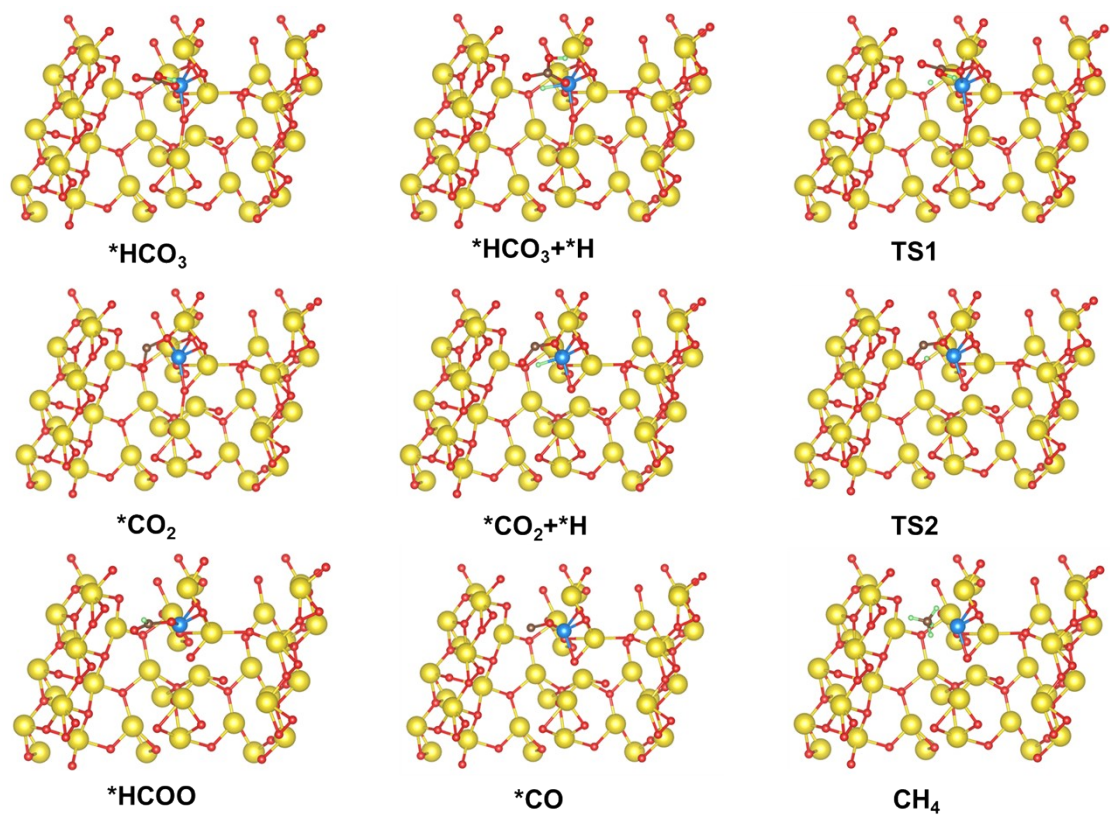

**Figure. S14.** Optimized geometric structure of the involved intermediates on Ru-O<sub>4</sub> SAs/PA.

**Table S1.** The loadings for Ru species was confirmed by ICP-OES.

| Catalysts                  | Metal loadings (wt.%) |
|----------------------------|-----------------------|
| Ru-F <sub>4</sub> SAs/PA-1 | 2.01                  |
| Ru-F <sub>4</sub> SAs/PA-2 | 3.71                  |
| Ru-F <sub>4</sub> SAs/PA-3 | 7.02                  |
| Ru-F <sub>4</sub> SAs/PA   | 5.12                  |
| Ru-O <sub>4</sub> SAs/PA   | 5.52                  |

**Table S2.** Ru K-edge EXAFS fitting results in *R* space for Ru foil and Ru<sub>0.88</sub>Co<sub>0.12</sub>/TiO<sub>2</sub>.

| Samples                  | Paths | C.N. <sup>[a]</sup> | R (Å) <sup>[b]</sup> | $\sigma^2(\text{Å}^2)$ <sup>[c]</sup> | $\Delta E_0$ <sup>[d]</sup> | R factor |
|--------------------------|-------|---------------------|----------------------|---------------------------------------|-----------------------------|----------|
| Ru foil                  | Ru-Ru | 12                  | 2.67                 | 0.0035                                | -6.0                        | 0.0080   |
|                          | Ru-O  | 6.0                 | 1.98                 | 0.0028                                | 1.1                         |          |
| RuO <sub>2</sub>         | Ru-Ru | 2.0                 | 3.09                 | 0.0026                                | -11.5                       | 0.0154   |
|                          | Ru-Ru | 8.0                 | 3.55                 | 0.0029                                | -3.5                        |          |
| Ru-F <sub>4</sub> SAs/PA | Ru-F1 | 1.9                 | 1.93                 | 0.0050                                | 3.6                         | 0.0138   |
|                          | Ru-F2 | 2.8                 | 2.07                 | 0.0020                                |                             |          |
| Ru-O <sub>4</sub> SAs/PA | Ru-O  | 4.3                 | 2.03                 | 0.0034                                | 3.2                         | 0.0073   |

[a] coordination numbers; [b] bond distance; [c] Debye-Waller factors; [d] the inner potential correction.





**Table S3.** The comparison of catalytic activities with other reported catalysts for photo-thermal synergistic catalytic CO<sub>2</sub> methanation.

| No. in Graph<br>Figure 3e | Catalyst                                                       | Light source                                           | Temperature<br>(°C) | Pressure<br>(MPa) | H <sub>2</sub> /CO <sub>2</sub><br>ratio | CH <sub>4</sub> rate<br>(mmol g <sub>cat</sub> <sup>-1</sup> h <sup>-1</sup> ) | Selectivity<br>(%) | Ref.         |
|---------------------------|----------------------------------------------------------------|--------------------------------------------------------|---------------------|-------------------|------------------------------------------|--------------------------------------------------------------------------------|--------------------|--------------|
| /                         | Ru-F <sub>4</sub> SAs/PA                                       | 300 W Xe lamp<br>1.9 W/cm <sup>2</sup> , Full          | 200                 | 0.1               | 4:1                                      | 47.4                                                                           | 93.8               | This<br>work |
| 1                         | Pt//LaCoO <sub>3</sub>                                         | 300 W Xe lamp<br>1.2 W/cm <sup>2</sup> , 420-780       | 200                 | 0.1               | 4:1                                      | 26.07                                                                          | 79                 | 4            |
| 2                         | Co <sub>7</sub> Cu <sub>1</sub> Mn <sub>1</sub> O <sub>x</sub> | 300 W Xe lamp<br>0.23 W/cm <sup>2</sup> , 300-<br>1100 | 200                 | 0.1               | 3:1                                      | 14.5                                                                           | 85.3               | 5            |
| 3                         | Ni/BN                                                          | 300 W Xe lamp<br>Full                                  | 230                 | 0.1               | 4:1                                      | 40.57                                                                          | 100                | 6            |
| 4                         | Ru/TiO <sub>2</sub>                                            | 300 W Xe lamp<br>0.1 W/cm <sup>2</sup> , 300-<br>1100  | 250                 | 0.1               | 3:1                                      | 46.15                                                                          | /                  | 7            |
| 5                         | Ir@UiO-66                                                      | 300 W Xe lamp<br>2.3 W/cm <sup>2</sup> , Full          | 250                 | 0.1               | 4:1                                      | 19.9                                                                           | 95                 | 8            |
| 6                         | Ag <sub>24</sub> Au/meso-<br>Co <sub>3</sub> O <sub>4</sub>    | 300 W Xe lamp<br>~0.2 W/cm <sup>2</sup> , 350-<br>780  | 240                 | 1.5               | 3:1                                      | 23                                                                             | 61                 | 9            |
| 7                         | Ni/CeO <sub>2</sub>                                            | 300 W Xe lamp<br>420-780                               | 250                 | /                 | 4:1                                      | 0.93                                                                           | /                  | 10           |
| 8                         | Ru/MnCo <sub>2</sub> O <sub>4</sub>                            | 300 W Xe lamp<br>1.25 W/cm <sup>2</sup> , 420-<br>780  | 210                 | 0.1               | 4:1                                      | 36.6                                                                           | 96                 | 11           |
| 9                         | Ru/Mg-CeO <sub>2</sub>                                         | 2.9 W/cm <sup>2</sup> , Full                           | 250                 | 0.1               | 4:1                                      | 26                                                                             | 59                 | 12           |
| 10                        | Ru <sub>0.10</sub> @ZrO <sub>2</sub>                           | 2.3 W/cm <sup>2</sup> ,<br>420-780 LED                 | 300                 | 0.1               | 4:1                                      | 65                                                                             | 100                | 13           |
| 11                        | Ru/TiO <sub>2</sub>                                            | 500 W Xe lamp<br>0.5 W/cm <sup>2</sup> , Full          | 300                 | /                 | 4:1                                      | 72.6                                                                           | /                  | 14           |

## References

1. G. Kresse and J. Furthmüller, *Phys. Rev. B*, 1996, **54**, 11169.
2. P.E. Blöchl, *Phys. Rev. B*, 1994, **50**, 17953.
3. J.P. Perdew, K. Burke and M. Ernzerhof, *Phys. Rev. Lett.*, 1996, **77**, 3865.
4. L. Wang, Y. Qi, Z. Yang, H. Wu, J. Liu, Y. Tang and F. Wang, *Green Energy and Resources*, 2023, **1**, 100036.
5. Z. He, Z. Li, Z. Wang, K. Wang, Y. Sun, S. Wang, W. Wang, Y. Yang and Z. Liu, *Green Chem.*, 2021, **23**, 5775-5785.
6. X. Zhu, H. Zong, C.J.V. Pérez, H. Miao, W. Sun, Z. Yuan, S. Wang, G. Zeng, H. Xu and Z. Jiang, *Angewandte Chemie*, 2023, **135**, e202218694.
7. C. Wang, S. Fang, S. Xie, Y. Zheng and Y.H. Hu, *J. Mater. Chem. A*, 2020, **8**, 7390-7394.
8. Y. Tang, Z. Yang, C. Guo, H. Han, Y. Jiang, Z. Wang, J. Liu, L. Wu, F. Wang, *J. Mater. Chem. A*, 2022, **10**, 12157.
9. Y. Xiong, X. Liu, Y. Hu, D. Gu, M. Jiang, Z. Tie and Z. Jin, *Nano Res.*, 2022, **15**, 4965-4972.
10. Z. Yang, D. Zheng, X. Yue, K. Wang, Y. Hou, W. Dai and X. Fu, *Appl. Surf. Sci.*, 2023, **615**, 156311.
11. C. Guo, Y. Tang, Z. Yang, T. Zhao, J. Liu, Y. Zhao and F. Wang, *ACS Nano*, 2023, **17**, 23761-23771.
12. Z. Zhang, T. Li, X. Sun, D. Luo, J. Yao, G. Yang, T. Xie, *J. Catal.*, 2024, 430, 115303.
13. F. Almazán, M. Lafuente, A. Echarte, M. Imizcoz, I. Pellejero, L. Gandía, *Chemistry*, 2023, **5**, 720-729.
14. H. Zhang, M. Chen, W. Qian, J. Zhang, X. Chen, J. Fang, C. Wang, C. Zhang, *J. Environ. Sci.*, 2024, <https://doi.org/10.1016/j.jes.2024.05.013>.
